# Supplementary material for: Intercomparisons of Tracker v1.1 and four other ocean particle-tracking software packages in the Regional Ocean Modeling System
Source: Copernicus journal article supplement (doi:10.5194/gmd-17-3341-2024), 2024-04-29
Supplement: Supplementary file 2 [file gmd-17-3341-2024-supplement.zip]

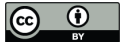

*Supplement of*

## **Intercomparisons of Tracker v1.1 and four other ocean particle-tracking software packages in the Regional Ocean Modeling System**

**Jilian Xiong and Parker MacCready**

*Correspondence to:* Jilian Xiong (xiongjilian@gmail.com, jxiong7@uw.edu)

- gmd-17-3341-2024-supplement-title-page.pdf
- LiveOcean\_particle\_tracking\_example\_in\_daily\_forecast.pdf
- experiments.py
- zfun.py

The copyright of individual parts of the supplement might differ from the article licence.
